# Supplementary material
Source: Research Square preprint supplement (doi:10.21203/rs.3.rs-10063093/v1)
Supplement: Supplementary file 1 [file 4953754739dd3566795af9cc.docx]

Supplementary Materials for

**Targeting LSD1 inhibits gastric cancer growth by reprogramming macrophage and restoring T-cell responses**


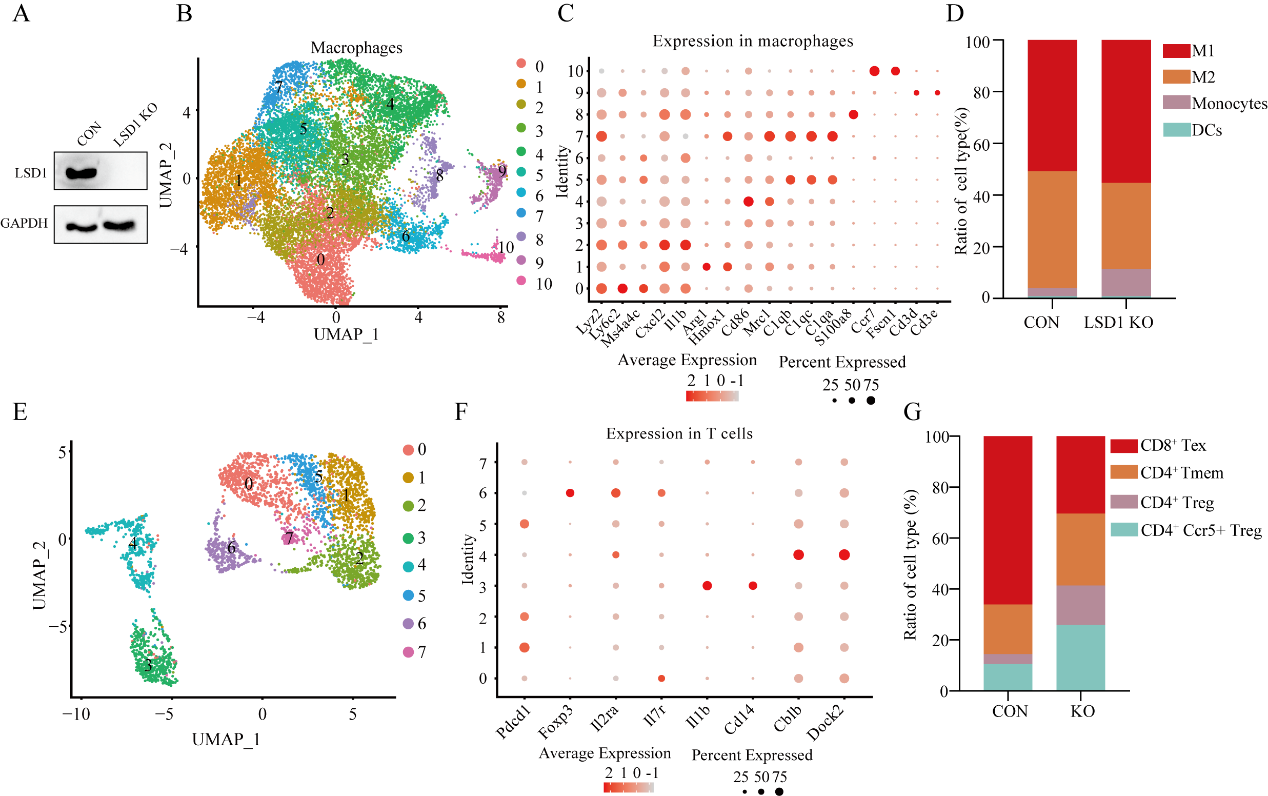


Fig. S1 Analysis of scRNA-seq data related to Fig. 1. A Validation of LSD1 deletion in MFC cells. B UMAP plot showing integrated macrophage clusters. Each dot represents a single cell, colored by cluster identity. C Dot plot showing the average expression of representative marker genes in macrophage clusters. Dot size indicates the percentage of cells expressing each gene. D Proportions of macrophage subtypes in tumors from MFC CON and MFC LSD1 KO groups. E UMAP plot of integrated T-cell clusters. Each dot represents a single cell, colored by cluster identity. F Dot plot showing the average expression of representative marker genes in T-cell clusters. Dot size reflects the proportion of expressing cells. G Proportions of T-cell subtypes in tumors from MFC CON and MFC LSD1 KO groups.


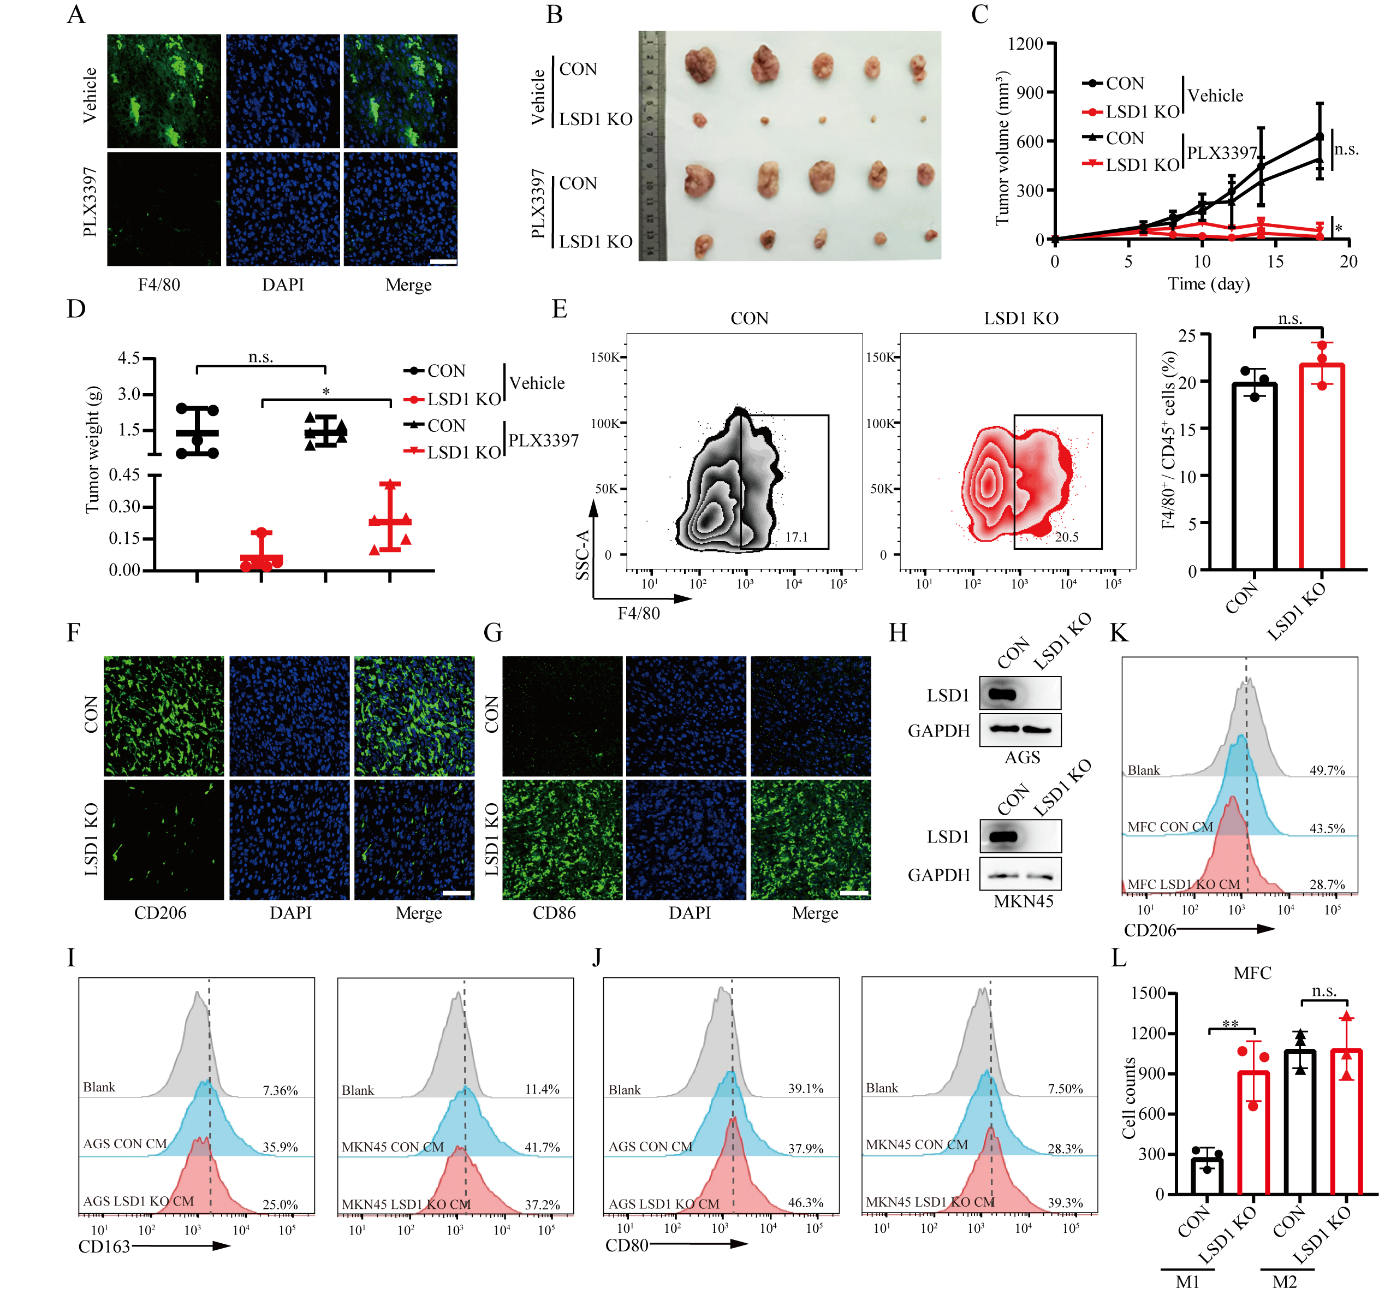


Fig. S2 Tumor cell-intrinsic LSD1 promotes tumor progression by facilitating M2 macrophage polarization while concurrently inhibiting M1 macrophage polarization. A Representative images showing macrophage depletion in the spleen of 615 mice treated with PLX3397. Scale bar, 50 µm. B-D Images of tumors (B), tumor growth curves (C), and tumor weights of 615 mice (D) bearing MFC CON or MFC LSD1 KO cells following macrophage depletion. The data are presented as the mean ± SD; *n* = 5; two-tailed unpaired Student’s t-test; n.s., no significance; **p* < 0.05. E Proportions of macrophages in TILs from MFC CON and MFC LSD1 KO tumors, as determined by flow cytometry. F and G Immunofluorescence staining of CD206+ (F) and CD86+ (G) in tumor tissues. Green, CD206/CD86; blue, nuclei. Scale bar, 50 µm. H Validation of LSD1 deletion in AGS and MKN45 cells. I and J Proportions of CD163+ (I) and CD80+ (J) macrophages after co-culture with CM from LSD1 knockout or control AGS and MKN45 cells. K Proportions of CD206+ macrophages after co-culture with CM from MFC CON or MFC LSD1 KO cells. L Chemotactic migration of M1 and M2 macrophages in response to CM from LSD1 knockout or control MFC cells. The data are presented as the mean ± SD; *n* = 3; two-tailed unpaired Student’s t-test; n.s., no significance; **p* < 0.05, ***p* < 0.01.


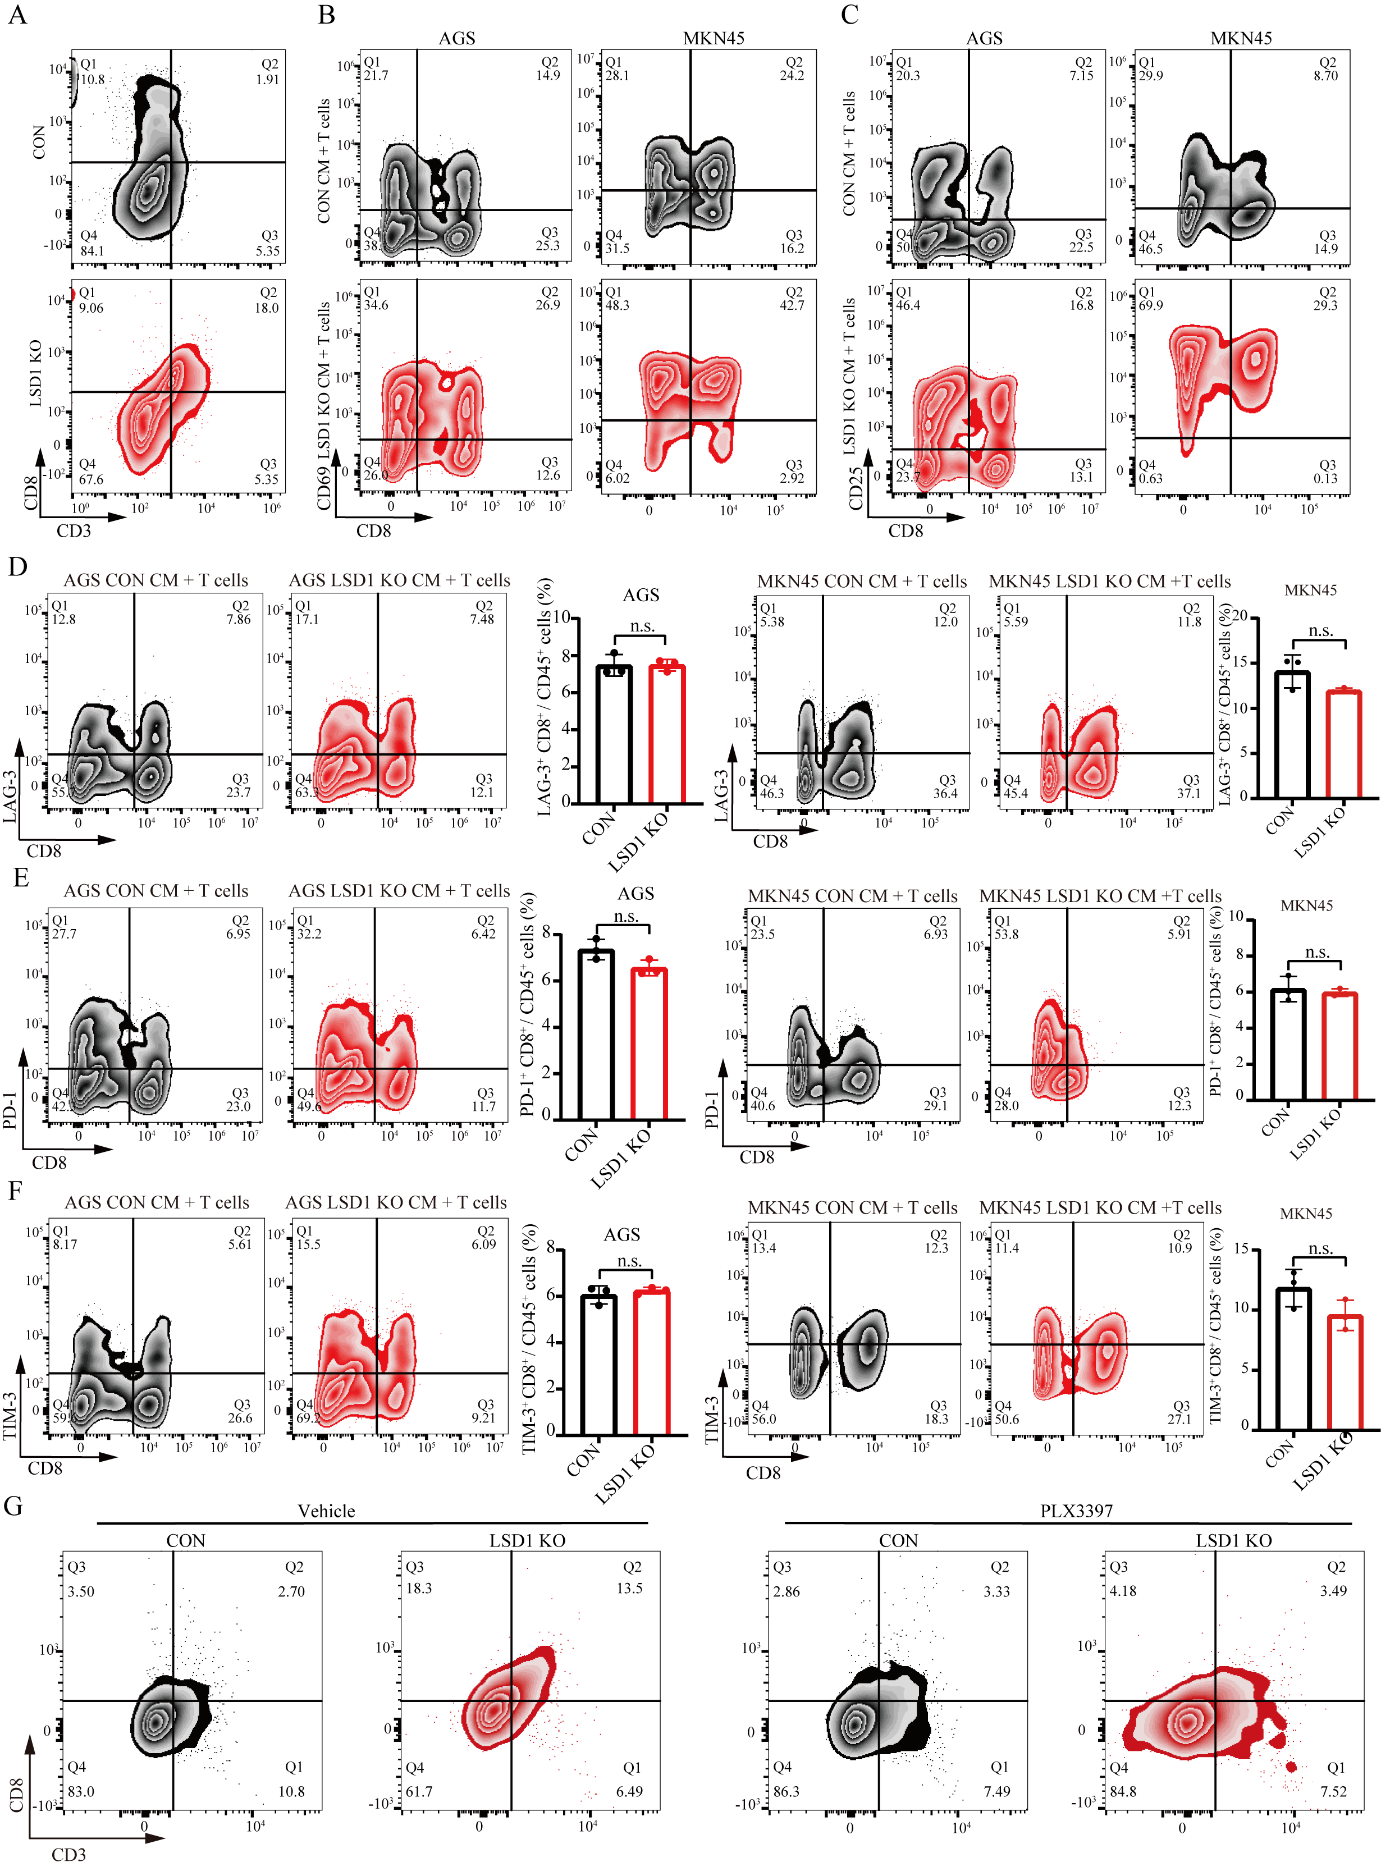


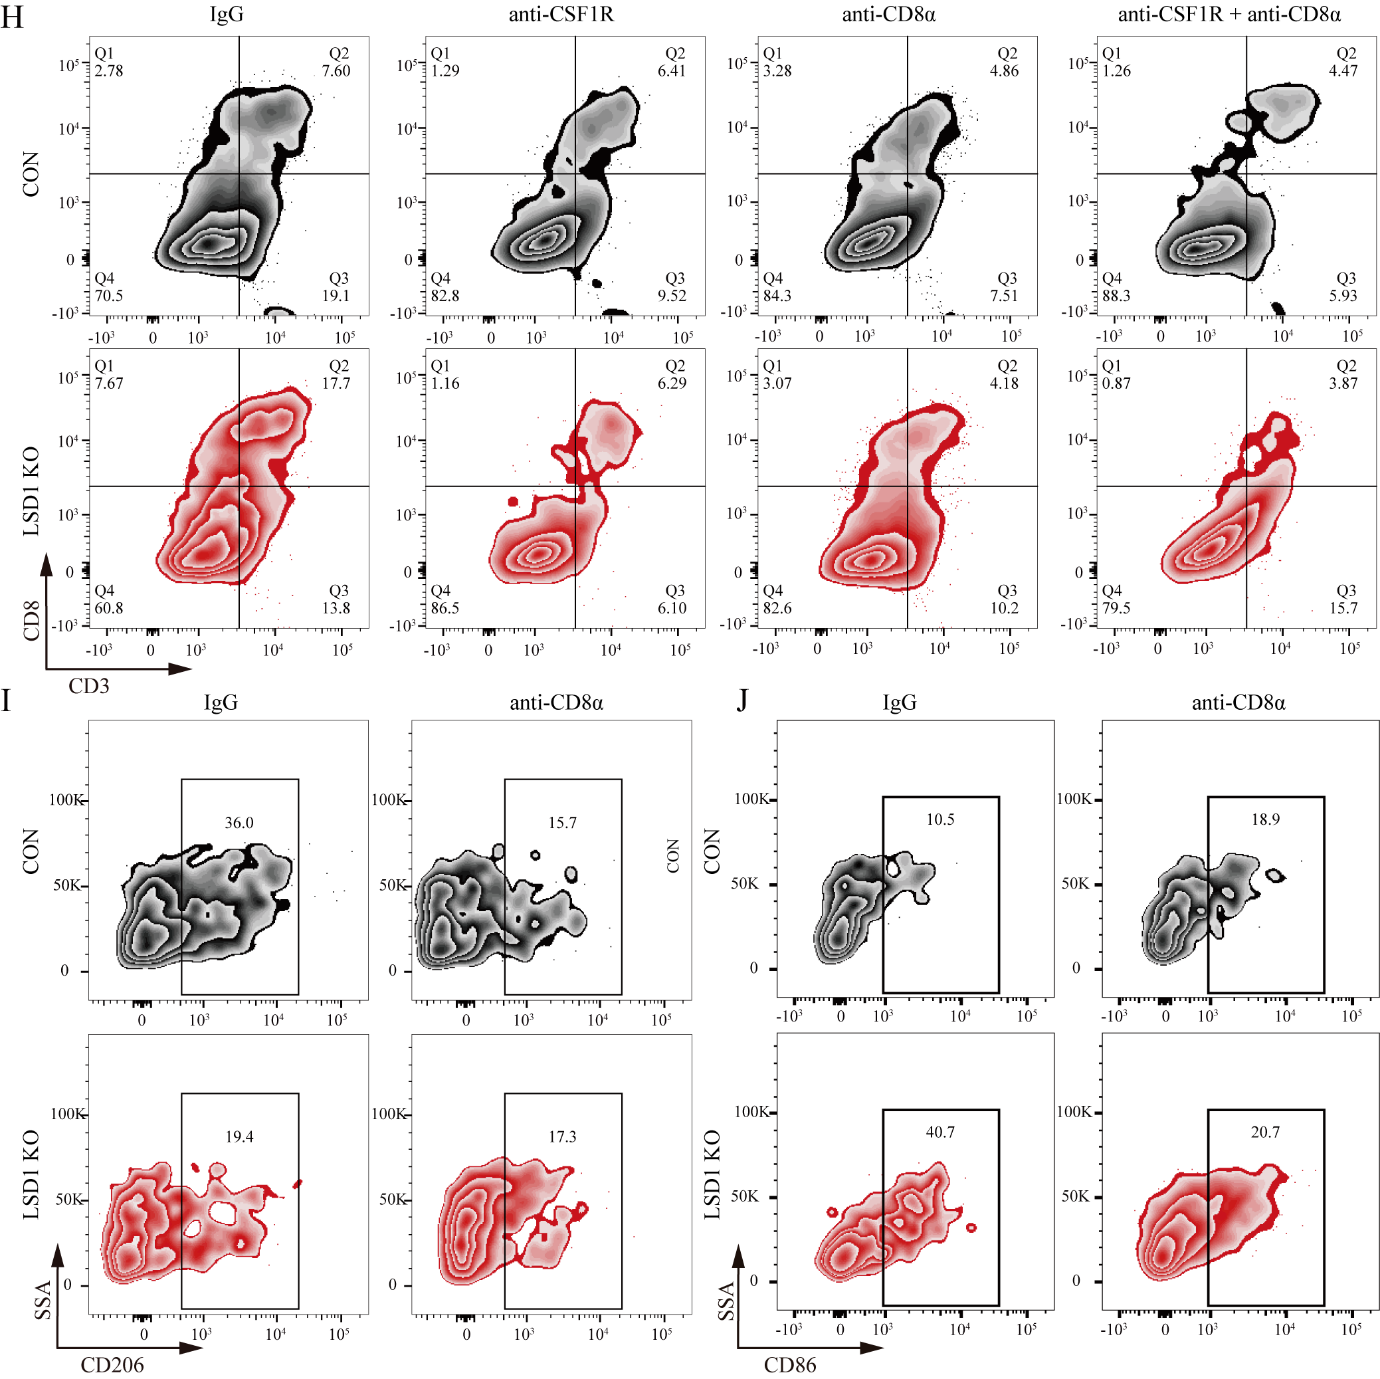


Fig. S3 Analysis of flow cytometry data related to Fig. 3. A Proportions of CD8+ T cells in TILs from MFC CON and MFC LSD1 KO tumors of 615 mice, as determined by flow cytometry. B and C Flow cytometric analysis of the proportions of CD8+CD69+T cells (B) and CD8+CD25+ T cells (C) after co-culture with CM from LSD1 knockout or control AGS and MKN45 cells. D-F Expression of LAG3 (D), PD-1 (E), and Tim-3 (F) was detected by flow cytometry following 8-day co-incubation with CM from LSD1 knockout or control MKN45. The data are presented as the mean ± SD; *n* = 3; two-tailed unpaired Student’s *t*-test; n.s., no significance. G Proportions of CD8+ T cells in TILs of tumors from 615 mice bearing MFC CON or MFC LSD1 KO cells, as determined by flow cytometry. H-J Flow cytometric analysis of CD8+ T cells (H), M2 macrophages (I), and M1 macrophages (J) in the TILs of tumors from 615 mice bearing MFC CON or MFC LSD1 KO cells.


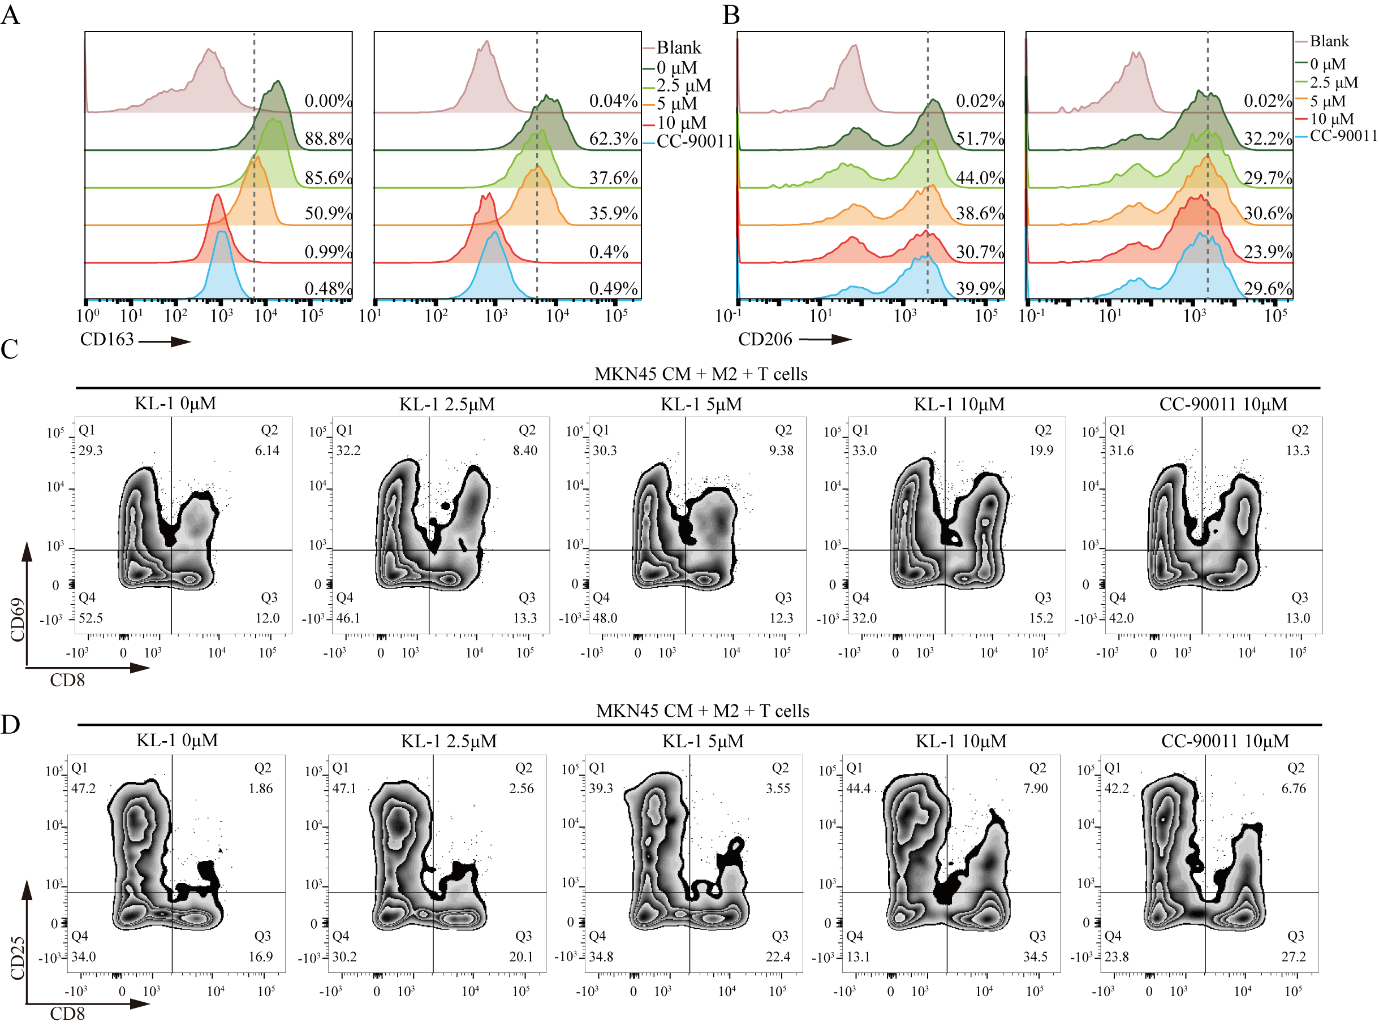


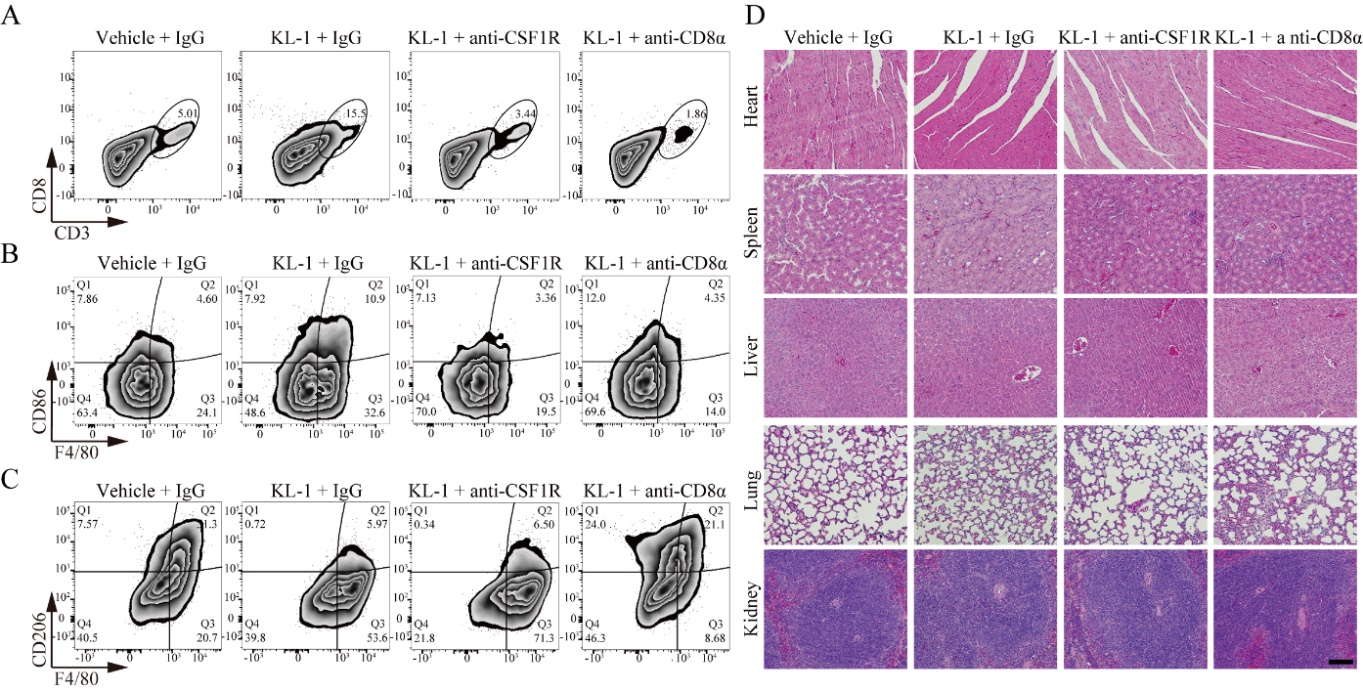
Fig. S4 LSD1 inhibitors inhibit the polarization of macrophages toward the M2 phenotype and enhance CD8+ T-cell activation. A and B Proportions of M0 macrophages polarized to CD163+ (A), CD206+ (B) phenotypes after co-culture with CM from AGS (left) and MKN45 (right) treated with KL-1. C and D Flow cytometric analysis of CD8+CD69+ (C and CD8+CD25+ (D) T cells after 48-hour co-culture with CM from MKN45 treated with KL-1.

Fig. S5 LSD1 inhibition suppresses GC growth by promoting the anti-tumor functions of macrophages and CD8+ T cells. A-C Flow cytometric analysis of the populations of CD8**+** T cells (A), M1 macrophages (B), and M2 macrophages (C) in TILs of tumors from 615 mice. D H&E staining to assess the in vivo toxicity of the LSD1 inhibitor KL-1. Scale bar, 300 μm.

**Supplementary Text**

**2,4-dichloroquinoline (B-1)**, white solid, yield: 31.8%. 1H NMR (400 MHz, CDCl3) δ 7.96 (d, *J* = 8.4 Hz, 1H), 7.87 (d, *J* = 8.4 Hz, 1H), 7.63 (t, *J* = 7.7 Hz, 1H), 7.47 (t, *J* = 7.2 Hz, 1H), 7.29 (d, *J* = 3.4 Hz, 1H). 13C NMR (100 MHz, CDCl3) δ 149.75, 147.98, 144.24, 131.48, 128.91, 127.84, 124.99, 124.05, 121.85.

***N*1-(2-chloroquinolin-4-yl)-*N*4,*N*4-diethylbenzene-1,4-diamine (C-1)**. yellow solid, yield: 29.4%. 1H NMR (400 MHz, CDCl3) δ 8.00 (d, *J* = 9.8 Hz, 1H), 7.79 (d, *J* = 8.0 Hz, 1H), 7.67 (t, *J* = 8.5 Hz, 1H), 7.38 (t, *J* = 7.3 Hz, 1H), 7.17 (d, *J* = 8.9 Hz, 2H), 7.03 (s, 1H), , 6.70 (d, *J* = 8.9 Hz, 2H), 3.38 (q, *J* = 7.1 Hz, 4H), 1.19 (t, *J* = 7.1 Hz, 6H). 13C NMR (100 MHz, CDCl3) δ 156.67, 148.85, 146.08, 143.47, 130.68, 127.07, 125.75, 124.23, 123.52, 122.62, 122.11, 113.41, 112.06, 110.76, 109.43, 44.68, 12.68.

***N1,N1*-diethyl-*N4*-(2-(4-(methylsulfonyl)phenyl)quinolin-4-yl)benzene-1,4-diamine** **(1)**. yellow solid, melting point: 219.3-220.5 ℃, yield: 23.1%. 1H NMR (400 MHz, CDCl3) δ 8.05 (d, *J* = 8.2 Hz, 2H), 7.79 (d, *J* = 8.4 Hz, 2H), 7.65–7.57 (m, 1H), 7.50 (d, J = 8.2 Hz, 1H), 7.21 (d, J = 8.8 Hz, 3H), 7.00 (s, 1H), 6.79 (s, 1H), 6.68 (d, *J* = 8.8 Hz, 1H), 3.35 (q, *J* = 7.0 Hz,4H), 3.13 (s, 3H), 1.17 (t, *J* = 7.0 Hz, 6H). 13C NMR (100 MHz, CDCl3) δ 156.23, 149.50, 148.76, 145.68, 138.96, 135.30, 130.31, 127.87, 126.69, 125.82, 122.83, 113.47, 112.14, 110.90, 109.53, 44.68, 12.65. HRMS (ESI) calcd for C26H28ClN3O2S1 [M+H]+, 446.1897; found: 446.1898. HPLC retention time = 5.227 min, purity = 95.75% (λ = 254 nm).

***N1,N1*-diethyl-*N4*-(2-phenylquinolin-4-yl)benzene-1,4-diamine (2)**. white solid, melting point: 224.7-225.9 ℃, yield: 15.2%. 1H NMR (400 MHz, CDCl3) δ 7.75 (d, *J* = 8.4 Hz, 1H), 7.63 (d, *J* = 6.7 Hz, 1H), 7.60–7.53 (m, 1H), 7.51–7.39 (m, 5H), 7.27 (s, 1H), 7.24 (s, 1H), 7.18 (t, *J* = 7.6 Hz, 1H), 6.81 (s, 1H), 6.72–6.61 (m, 3H), 3.34 (d, *J* = 7.0 Hz, 4H), 1.16 (t, *J* = 7.0 Hz, 6H). 13C NMR (100 MHz, CDCl3) δ 156.21, 150.14, 148.69, 145.69, 138.69, 127.87, 126.56, 122.93, 112.80, 51.67, 44.67, 12.66. HRMS (ESI) calcd for C25H25N3 [M+H]+, 368.2121; found: 368.2121. HPLC retention time = 5.398 min, purity = 96.79% (λ = 254 nm).

***N1,N1*-diethyl-*N4*-(2-(p-tolyl)quinolin-4-yl)benzene-1,4-diamine (3)**. yellow solid, melting point: 219.3-220.5 ℃, yield: 23.1%. 1H NMR (400 MHz, CDCl3) δ 7.74 (d, *J* = 7.2 Hz, 1H), 7.66 (d, *J* = 9.8 Hz, 1H), 7.55 (t, *J* = 7.7 Hz, 1H), 7.34 (d, *J* = 8.2 Hz, 2H), 7.29–7.26 (m, 3H), 7.24 (s, 1H), 7.19–7.13 (m, 1H), 6.80 (s, 1H), 6.68 (d, *J* = 9.0 Hz, 3H), 3.34 (q, *J* = 7.1 Hz, 4H), 2.43 (s, 3H), 1.16 (t, *J* = 7.0 Hz, 6H). 13C NMR (100 MHz, CDCl3) δ 156.16, 148.59, 145.58, 138.01, 135.70, 129.18, 127.92, 125.74, 112.91, 110.33, 44.61, 21.18, 12.50. HRMS (ESI) calcd for C26H27N3 [M+H]+, 382.2278; found: 382.2283. HPLC retention time = 5.657 min, purity = 97.60% (λ = 254 nm).

***N1,N1*-diethyl-*N4*-(2-(4-methoxyphenyl)quinolin-4-yl)benzene-1,4-diamine (4)**. yellow solid, melting point: 249.2-250.9 ℃, yield: 32.9%. 1H NMR (400 MHz, CDCl3) δ 7.74 (d, *J* = 9.7 Hz, 1H), 7.68 (d, *J* = 8.3 Hz, 1H), 7.54 (t, *J* = 7.7 Hz, 1H), 7.37(d, *J* = 8.8 Hz, 2H), 7.28–7.25 (m, 1H), 7.24–7.23 (s, 1H), 7.17 (t, *J* = 8.3 Hz, 1H), 6.99 (d, *J* = 8.8 Hz, 2H), 6.79 (s, 1H), 6.68 (d, *J* = 9.0 Hz, 3H), 3.86 (s, 3H), 3.34 (q, *J* = 7.0 Hz, 4H), 1.16 (t, *J* = 7.0 Hz, 6H). 13C NMR (100 MHz, CDCl3) δ 159.64, 156.15, 149.74, 148.64, 145.58, 130.93, 130.54, 129.59, 127.98, 126.47, 125.88, 125.50, 123.06, 122.33, 113.91, 112.76, 110.11, 55.47, 44.61, 12.55. HRMS (ESI) calcd for C26H27N3O[M+H]+, 398.2227; found: 398.2224. HPLC retention time = 6.029 min, purity = 96.23% (λ = 254 nm).

***N1,N1*-diethyl-*N4*-(2-(4-(methylthio)phenyl)quinolin-4-yl)benzene-1,4-diamine (5)**. yellow solid, melting point: 251.8-252.3 ℃, yield: 48.1%. 1H NMR (400 MHz, CDCl3) δ 7.75 (d, *J* = 8.5 Hz, 1H), 7.64 (d, *J* = 8.4 Hz, 1H), 7.55 (t, *J* = 6.8 Hz, 1H), 7.38–7.31 (m, 4H), 7.26 (s, 1H), 7.24 (s, 1H), 7.17 (t, *J* = 6.9 Hz, 1H), 6.78 (s, 1H), 6.73 (s, 1H), 6.68 (d, *J* = 9.0 Hz, 2H), 3.34 (q, *J* = 7.0 Hz, 4H), 2.53 (s, 3H), 1.16 (t, *J* = 7.0 Hz, 6H). 13C NMR (100 MHz, CDCl3) δ 156.13, 149.44, 148.63, 145.60, 138.89, 135.23, 129.95, 129.69, 126.35, 126.08, 125.73, 125.49, 122.76, 122.24, 112.67, 110.05, 44.60, 15.77, 12.70. HRMS (ESI) calcd for C26H27N3S[M+H]+, 414.1998; found: 414.1997. HPLC retention time = 5.981 min, purity = 97.39% (λ = 254 nm).

***N1*-(2-(4-aminophenyl)quinolin-4-yl)-*N4,N4*-diethylbenzene-1,4-diamine (6).** brown solid, melting point: 250.2-251.3 ℃, yield: 40.9%. 1H NMR (400 MHz, CDCl3) δ 7.74 (d, *J* = 9.5 Hz, 2H), 7.54 (t, *J* = 8.3 Hz, 1H), 7.24 (d, *J* = 3.9 Hz, 4H), 7.18 (t, *J* = 8.2 Hz, 1H), 6.78 (d, *J* = 4.5 Hz, 2H), 6.76 (s, 1H), 6.69 (d, *J* = 9.0 Hz,2H), 3.81 (s, 2H), 3.35 (q, *J* = 7.1 Hz, 4H), 1.16 (t, *J* = 7.1 Hz, 6H). 13C NMR (100 MHz, CDCl3) δ 156.22, 150.19, 148.66, 146.58, 145.51, 130.59, 129.44, 128.59, 128.13, 126.41, 126.02, 125.56, 123.16, 114.81, 112.83, 109.92, 44.66, 12.57. HRMS (ESI) calcd for C25H26N4 [M+H]+, 383.2232; found: 383.2232. HPLC retention time = 5.604 min, purity = 97.71% (λ = 254 nm).

***N1,N1*-diethyl-*N4*-(2-(4-fluorophenyl)quinolin-4-yl)benzene-1,4-diamine (7).** yellow solid, melting point: 268.3-269.9 ℃, yield: 28.9%. 1H NMR (400 MHz, CDCl3) δ 7.75 (d, *J* = 8.4 Hz, 1H), 7.60–7.52 (m, 2H), 7.43–7.37 (m, 1H), 7.26 (s, 1H), 7.24 (s, 1H), 7.21–7.12 (m, 3H), 6.78 (s, 1H), 6.69 (d, *J* = 9.0 Hz, 2H), 3.35 (q, *J* = 7.0 Hz, 4H), 1.16 (t, *J* = 7.1 Hz, 6H). 13C NMR (100 MHz, CDCl3) δ 163.98, 161.51, 156.05, 149.01, 148.54, 145.66, 134.50, 130.99, 129.67, 127.73, 126.45, 125.76, 125.52, 122.77, 115.41, 112.63, 110.23, 44.59, 12.49. 19F NMR (376 MHz, CDCl3) δ -113.69. HRMS (ESI) calcd for C25H24FN3 [M+H]+, 386.2027; found: 386.2026. HPLC retention time = 6.639 min, purity = 96.43% (λ = 254 nm).

***N*1,*N*1-diethyl-*N*4-(2-(4-(trifluoromethyl)phenyl)quinolin-4-yl)benzene-1,4-diamine (8).** yellow solid, melting point: 230.9-231.1 ℃, yield: 42.9%. 1H NMR (400 MHz, CDCl3) δ 7.76 (d, *J* = 9.8 Hz, 1H), 7.72 (d, *J* = 8.3 Hz, 2H), 7.59–7.49 (m, 4H), 7.24 (d, *J* = 3.8 Hz, 2H), 7.20–7.14 (m, 1H), 6.83 (s, 1H), 6.78 (s, 1H), 6.68 (d, *J* = 8.9 Hz, 2H), 3.34 (q, *J* = 7.1 Hz, 4H), 1.16 (t, *J* = 7.1 Hz, 6H). 13C NMR (100 MHz, CDCl3) δ 156.05, 148.65, 148.48, 145.75, 142.29, 130.51, 130.19, 129.87, 127.58, 126.69, 125.93, 125.51, 122.76, 122.32, 113.03, 112.41, 110.67, 110.00, 44.57, 12.85, 12.33. 19F NMR (376 MHz, CDCl3) δ -102.73. HRMS (ESI) calcd for C26H24F3N3 [M+H]+, 436.1995; found: 436.1982. HPLC retention time = 5.405 min, purity = 95.39% (λ = 254 nm).

***N1,N1*-diethyl-*N4*-(2-(4-nitrophenyl)quinolin-4-yl)benzene-1,4-diamine (9)**. red solid, melting point: 245.9-247.1 ℃, yield: 30.1%. 1H NMR (400 MHz, CDCl3) δ 8.32 (d, *J* = 8.8 Hz, 2H), 7.76 (d, *J* = 7.8 Hz, 1H), 7.64–7.53 (m, 3H), 7.48 (d, *J* = 9.8 Hz, 1H), 7.26 (s, 1H), 7.24 (s, 1H), 7.19 (t, *J* = 7.7 Hz, 1H), 6.86 (s, 1H), 6.79 (s, 1H), 6.69 (d, *J* = 9.0 Hz, 2H), 3.34 (q, *J* = 7.1 Hz, 4H), 1.16 (t, *J* = 7.0 Hz, 6H). 13C NMR (100 MHz, CDCl3) δ 155.96, 148.67, 147.75, 147.54, 145.80, 130.41, 130.10, 127.38, 126.82, 125.83, 125.03, 123.68, 122.91, 121.88, 112.72, 110.25, 44.61, 12.53. HRMS (ESI) calcd for C25H24N4O2 [M+H]+, 413.1972; found: 413.1967. HPLC retention time = 6.649 min, purity = 97.95% (λ = 254 nm).

**4-(4-((4-(diethylamino)phenyl)amino)quinolin-2-yl)phenol (10)**. white solid, melting point: 235.8-236.3 ℃, yield: 14.9%. 1H NMR (400 MHz, CDCl3) δ 7.78 (d, *J* = 8.4 Hz, 1H), 7.70 (d, *J* = 7.5 Hz, 1H), 7.55 (t, *J* = 7.7 Hz, 1H), 7.31 (d, *J* = 8.5 Hz, 2H), 7.19 (t, *J* = 8.9 Hz, 3H), 6.97 (d, *J* = 8.5 Hz, 2H), 6.80 (s, 1H), 6.67 (d, *J* = 9.0 Hz, 2H), 3.34 (q, *J* = 7.1 Hz, 4H), 1.15 (t, *J* = 7.0 Hz, 6H). 13C NMR (100 MHz, CDCl3) δ 156.94, 156.06, 145.97, 130.86, 126.11, 122.86, 115.76, 112.82, 110.07, 44.57, 12.46. HRMS (ESI) calcd for C25H25N3O[M+H]+, 384.2070; found: 384.2070. HPLC retention time = 6.023 min, purity = 95.71% (λ = 254 nm).

**3-(4-((4-(diethylamino)phenyl)amino)quinolin-2-yl)phenol (11)**. yellow solid, melting point: 234.7-235.9 ℃, yield: 29.7%. 1H NMR (400 MHz, CDCl3) δ 7.74 (d, *J* = 7.9 Hz, 1H), 7.63 (d, *J* = 8.5 Hz, 1H), 7.47 (t, *J* = 7.7 Hz, 1H), 7.32 (d, *J* = 7.7 Hz, 1H), 7.11 (d, *J* = 8.2 Hz, 1H), 7.05 (d, *J* = 8.9 Hz, 2H), 6.98 (d, *J* = 7.5 Hz, 1H), 6.89 (d, *J* = 6.9 Hz, 1H), 6.85 (s, 1H), 6.73 (s, 1H), 6.61 (d, *J* = 8.8 Hz, 2H), 3.32 (q, *J* = 7.3 Hz, 4H), 1.15 (t, *J* = 7.0 Hz, 6H). 13C NMR (100 MHz, CDCl3) δ 156.68, 148.04, 145.71, 137.73, 127.93, 126.45, 125.26, 123.94, 123.11, 121.76, 113.56, 112.12, 111.21, 109.84, 44.71, 12.64. HRMS (ESI) calcd for C25H25N3O[M+H]+, 384.2070; found: 384.2074. HPLC retention time = 5.833 min, purity = 98.18% (λ = 254 nm).

**2-(4-((4-(diethylamino)phenyl)amino)quinolin-2-yl)phenol (12).** yellow solid, melting point: 233.6-234.7 ℃, yield: 41.5%. 1H NMR (400 MHz, DMSO-*d*6) δ 9.55 (s, 1H), 8.99 (s, 1H), 7.71 (d, *J* = 9.0 Hz, 2H), 7.63 (d, *J* = 8.2 Hz, 1H), 7.49 (t, *J* = 8.5 Hz, 1H), 7.34-7.27 (m, 2H), 7.19 (d, *J* = 9.3 Hz, 1H), 7.12 (t, *J* = 7.5 Hz, 1H), 7.02 (d, *J* = 7.9 Hz, 1H), 6.95 (t, *J* = 7.0 Hz, 1H), 6.82 (s, 1H), 6.71 (d, *J* = 9.0 Hz, 2H), 3.31 (q, *J* = 6.9 Hz, 4H), 1.09 (t, *J* = 7.0 Hz, 6H). 13C NMR (100 MHz, DMSO-*d*6) δ 155.08, 148.10, 146.54, 143.57, 131.21, 130.14, 129.52, 126.70, 125.33, 123.17, 122.15, 121.55, 119.70, 116.23, 114.52, 113.23, 44.50, 12.96. HRMS (ESI) calcd for C25H25N3O[M+H]+, 384.2070; found: 384.2074. HPLC retention time = 6.411 min, purity = 98.25% (λ = 254 nm).

**4-(4-((4-(diethylamino)phenyl)amino)quinolin-2-yl)-2-fluorobenzonitrile (13)**. yellow solid, melting point: 259.6-260.3 ℃, yield: 17.2%. 1H NMR (400 MHz, CDCl3) δ 7.78–7.73 (m, 1H), 7.71 (d, *J* = 6.5 Hz, 1H), 7.59 (t, *J* = 6.9 Hz, 1H), 7.46 (d, *J* = 6.8 Hz, 1H), 7.36–7.28 (m, 2H), 7.24–7.18 (m, 3H), 6.81 (s, 1H), 6.75 (s, 1H), 6.69 (d, *J* = 9.0 Hz, 2H), 3.35 (q, *J* = 7.1 Hz, 4H), 1.17 (t, *J* = 7.1 Hz, 6H). 13C NMR (100 MHz, CDCl3) δ 164.23, 161.65, 155.92, 148.54, 146.71, 145.88, 133.42, 130.18, 127.14, 125.97, 124.62, 122.87, 121.45, 117.31, 113.72, 112.52, 110.09, 101.23, 94.02, 44.56, 12.69. 19F NMR (376 MHz, CDCl3) δ -104.07. HRMS (ESI) calcd for C26H23FN4 [M+H]+, 411.1980; found: 411.1981. HPLC retention time = 6.753 min, purity = 98.26% (λ = 254 nm).

***N1,N1*-diethyl-*N4*-(quinolin-4-yl)benzene-1,4-diamine (14).** white solid, melting point: 248.5-249.3 ℃, yield: 50.9%. 1H NMR (400 MHz, DMSO-*d*6) δ 10.77 (s, 1H), 8.77 (d, *J* = 8.3 Hz, 1H), 8.41 (d, *J* = 7.0 Hz, 1H), 8.05 (d, *J* = 7.8 Hz, 1H), 7.99 (t, *J* = 7.7 Hz, 1H), 7.75 (t, *J* = 7.2 Hz, 1H), 7.22 (d, *J* = 8.9 Hz, 2H), 6.80 (d, *J* = 9.2 Hz, 2H), 6.65 (d, *J* = 7.0 Hz, 1H), 3.42–3.39 (m, 4H), 1.13 (t, *J* = 7.0 Hz, 6H). 13C NMR (100 MHz, DMSO-*d*6) δ 155.87, 147.28, 138.86, 134.18, 127.28, 124.60, 123.94, 120.83, 117.36, 112.51, 99.97, 44.32, 12.89. HRMS (ESI) calcd for C19H21N3 [M+H]+, 292.1808; found: 292.1813. HPLC retention time = 6.771 min, purity = 98.21% (λ = 254 nm).

***N1,N1*-diethyl-*N4*-(2-methylquinolin-4-yl)benzene-1,4-diamine (15)**. white solid, melting point: 242.1-243.8 ℃, yield: 76.3%. 1H NMR (400 MHz, MeOD) δ 8.48 (d, *J* = 7.0 Hz, 1H), 7.94 (t, *J* = 7.8 Hz, 1H), 7.84 (d, *J* = 8.5 Hz, 1H), 7.70 (t, *J* = 7.7 Hz, 1H), 7.21 (d, *J* = 9.0 Hz, 2H), 6.83 (d, *J* = 9.0 Hz, 2H), 6.58 (s, 1H), 3.44 (q, *J* = 7.1 Hz, 4H), 2.58 (s, 3H), 1.20 (t, *J* = 7.1 Hz, 6H). 13C NMR (100 MHz, MeOD) δ 156.16, 153.89, 147.47, 138.63, 133.55, 126.68, 126.52, 122.49, 119.21, 116.15, 112.20, 99.55, 44.17, 18.93. HRMS (ESI) calcd for C20H23N3 [M+H]+, 306.1965; found: 306.1961. HPLC retention time = 6.753 min, purity = 98.26% (λ = 254 nm).

***N1,N1*-diethyl-*N4*-(2-(pyridin-3-yl)quinolin-4-yl)benzene-1,4-diamine (16)**. brown solid, melting point: 231.9-233.5 ℃, yield: 8.5%. 1H NMR (400 MHz, DMSO-*d*6) δ 9.11 (s, 1H), 8.73 (d, *J* = 6.3 Hz, 1H),8.04–7.94 (d, *J* = 8.0 Hz, 1H), 7.74–7.64 (m, 3H), 7.64–7.52 (m, 2H), 7.46 (d, *J* = 7.4 Hz, 1H), 7.21 (t, *J* = 7.7 Hz, 1H), 6.90 (s, 1H), 6.71 (d, *J* = 9.0 Hz, 2H), 3.29 (d, *J* = 7.0 Hz, 4H), 1.09 (t, *J* = 7.0 Hz, 6H). 13C NMR (100 MHz, DMSO-*d*6) δ 154.76, 148.86, 147.78, 140.83, 137.00, 131.17, 129.76, 127.95, 123.77, 121.44, 113.23, 44.48, 12.95. HRMS (ESI) calcd for C24H24N4 [M+H]+, 369.2074; found: 369.2069.HPLC retention time = 5.979 min, purity = 97.92% (λ = 254 nm).

***N1,N1*-diethyl-*N4*-(2-(pyrimidin-5-yl)quinolin-4-yl)benzene-1,4-diamine (17).** brown solid, melting point: 235.7-237.0 ℃ yield: 11.5%. 1H NMR (400 MHz, CDCl3) δ 9.31 (s, 1H), 8.84 (s, 2H), 7.79 (d, *J* = 8.4 Hz, 1H), 7.62 (t, *J* = 8.2 Hz, 1H), 7.53–7.46 (m, 1H), 7.25–7.20 (d, *J* = 9.0 Hz, 3H), 6.78 (s, 1H), 6.69 (d, *J* = 9.0 Hz, 2H), 3.36 (q, *J* = 7.2 Hz, 4H), 1.17 (t, *J* = 7.0 Hz, 6H). 13C NMR (100 MHz, CDCl3) δ 158.42, 156.75, 156.08, 148.67, 145.99, 142.46, 132.45, 130.35, 127.03, 126.88, 126.01, 124.42, 123.10, 121.89, 112.64, 110.95, 44.59, 12.56. HRMS (ESI) calcd for C23H23N5 [M+H]+, 370.2026; found: 370.2025. HPLC retention time = 5.557 min, purity = 98.51% (λ = 254 nm).

***N1,N1*-diethyl-*N4*-(2-(furan-2-yl)quinolin-4-yl)benzene-1,4-diamine (18).** yellow solid, melting point: 266.5-268.1 ℃ yield: 59.3%. 1H NMR (400 MHz, CDCl3) δ 8.21 (d, *J* = 8.3 Hz, 1H), 7.74 (d, *J* = 8.5 Hz, 1H), 7.62–7.53 (m, 2H), 7.31–7.27 (d, *J* = 8.9 Hz, 3H), 7.11 (s, 1H), 6.84 (d, *J* = 3.5 Hz, 1H), 6.72 (d, *J* = 8.9 Hz, 3H), 6.56 (s, 1H), 3.36 (q, *J* = 7.0 Hz, 4H), 1.18 (t, *J* = 7.0 Hz, 6H). 13C NMR (100 MHz, CDCl3) δ 150.82, 146.01, 143.59, 140.36, 138.09, 132.22, 124.45, 122.67, 121.46, 120.08, 117.43, 115.38, 107.65, 106.54–106.23 (m), 102.77, 39.37, 7.32. HRMS (ESI) calcd for C23H23N3O [M+H]+, 358.1914; found: 358.1917. HPLC retention time = 6.556 min, purity = 97.14% (λ = 254 nm).

***N*1,*N*1-diethyl-*N*4-(2-(5-methylthiophen-2-yl)quinolin-4-yl)benzene-1,4-diamine (19)**. yellow solid, melting point: 247.6-248.9 ℃, yield: 34.1%. 1H NMR (400 MHz, CDCl3) δ 8.06 (d, *J* = 8.4 Hz, 1H), 7.73 (d, *J* = 7.0 Hz, 1H), 7.60–7.52 (m, 1H), 7.27 (s, 1H), 7.25–7.21 (m, 2H), 7.08 (d, *J* = 3.5 Hz, 2H), 6.90 (s, 1H), 6.84–6.78 (m, 1H), 6.74–6.66 (m, 2H), 3.36 (q, *J* = 7.1 Hz, 4H), 2.54 (s, 3H), 1.17 (t, *J* = 7.0 Hz, 6H). 13C NMR (100 MHz, CDCl3) δ 164.89, 155.94, 148.78, 145.60, 142.58, 141.41, 137.00, 129.67, 127.89, 125.56, 122.46, 112.79, 110.58, 44.61, 15.38, 12.55. HRMS (ESI) calcd for C24H25N3S [M+H]+, 388.1842; found: 388.1838. HPLC retention time = 6.247 min, purity = 95.02% (λ = 254 nm).

***N1*-(2-(1*H*-pyrazol-5-yl)quinolin-4-yl)-*N4,N4*-diethylbenzene-1,4-diamine (20)**. yellow solid, melting point: 259.3-260.2 ℃, yield: 66.4%. 1H NMR (400 MHz, CDCl3) δ 8.15 (d, *J* = 7.5 Hz, 1H), 7.73 (d, *J* = 8.0 Hz, 1H), 7.54 (t, *J* = 8.4 Hz, 1H), 7.46 (s, 1H), 7.24–7.16 (m, 3H), 7.03 (s, 1H), 6.63 (d, *J* = 9.0 Hz, 2H), 6.56 (d, *J* = 2.3 Hz, 1H), 3.31 (q, *J* = 7.0 Hz, 4H)., 1.13 (t, *J* = 7.0 Hz, 6H). 13C NMR (100 MHz, CDCl3) δ 156.11, 148.67, 145.60, 129.92, 127.84, 125.65, 122.06, 113.66, 112.68, 110.33, 44.59, 12.72. HRMS (ESI) calcd for C22H23N5 [M+H]+, 358.2026; found: 358.2027. HPLC retention time = 6.485 min, purity = 95.17% (λ = 254 nm).

***N1*-(2-(2,3-dihydrobenzo[b][1,4]dioxin-6-yl)quinolin-4-yl)-*N4,N4*-diethylbenzene-1,4-diamine (21)**. white solid, melting point: 233.9-235.1 ℃, yield: 70.1%. 1H NMR (400 MHz, CDCl3) δ 7.73 (t, *J* = 6.5 Hz, 2H), 7.58–7.50 (m, 1H), 7.23 (s, 1H), 7.18 (t, *J* = 7.0 Hz, 1H), 6.98–6.95 (m, 1H), 6.95–6.90 (m, 2H), 6.78 (s, 1H), 6.68 (d, *J* = 9.0 Hz, 2H), 4.30 (s, 4H), 3.34 (q, *J* = 7.0 Hz, 4H), 1.16 (t, *J* = 7.0 Hz, 6H). 13C NMR (100 MHz, CDCl3) δ 156.15, 149.48, 148.57, 145.63, 143.70, 143.36, 131.88, 129.56, 127.89, 126.39, 125.85, 125.62, 122.89, 122.65, 122.23, 118.29, 117.20, 112.85, 110.13, 64.43, 44.60, 12.64. HRMS (ESI) calcd for C27H27N3O2 [M+H]+, 426.2176; found: 426.2182. HPLC retention time = 7.00 min, purity = 95.68% (λ = 254 nm).

***N1*-(2-(benzo[b]thiophen-2-yl)quinolin-4-yl)-*N4,N4*-diethylbenzene-1,4-diamine (22).** yellow solid, melting point: 241.7-242.3 ℃, yield: 38.2%. 1H NMR (400 MHz, CDCl3) δ 8.05 (d, *J* = 8.4 Hz, 1H), 7.88–7.82 (m, 2H), 7.77 (d, *J* = 8.3 Hz, 1H), 7.58 (t, *J* = 7.7 Hz, 1H), 7.48 (s, 1H), 7.45–7.33 (m, 2H), 7.27 (d, *J* = 8.9 Hz, 2H), 7.01 (s, 1H), 6.77 (s, 1H), 6.70 (d, *J* = 8.9 Hz, 2H), 3.34 (q, *J* = 7.0 Hz, 4H), 1.16 (t, *J* = 7.1 Hz, 6H). 13C NMR (100 MHz, CDCl3) δ 158.37, 151.90, 151.07, 150.72, 146.15, 145.82, 134.30, 131.97, 131.67, 128.99, 128.29, 127.47, 125.38, 125.06, 124.79, 120.76, 119.65, 116.01, 66.91, 43.39, 12.64. HRMS (ESI) calcd for C27H25N3S [M+H]+, 424.1842; found: 424.1843. HPLC retention time = 6.812 min, purity = 95.25% (λ = 254 nm).

**4-((4-((4-(diethylamino)phenyl)amino)quinolin-2-yl)thio)phenol (23)**. red solid, melting point: 255.1-256.9 ℃, yield: 28.1%. 1H NMR (600 MHz, CDCl3) δ 7.97 (d, *J* = 7.9 Hz, 1H), 7.69 (d, *J* = 8.4 Hz, 1H), 7.57 (t, *J* = 7.3 Hz, 1H), 7.37 (d, *J* = 8.4 Hz, 2H), 7.29 (d, *J* = 7.3 Hz, 1H), 6.98 (d, *J* = 8.7 Hz, 2H), 6.86 (d, *J* = 8.5 Hz, 2H), 6.60 (d, *J* = 8.8 Hz, 2H), 6.12 (s, 1H), 3.32 (q, *J* = 7.1 Hz, 4H), 1.15 (t, *J* = 7.1 Hz, 6H). 13C NMR (100 MHz, CDCl3) δ 156.48, 147.84, 145.51, 137.53, 129.66, 127.73, 126.25, 125.06, 123.74, 122.91, 121.56, 113.36, 111.92, 111.01, 109.64, 44.51, 12.44. HRMS (ESI) calcd for C25H25N3OS [M+H]+, 416.1791; found: 416.1796. HPLC retention time = 6.607 min, purity = 96.25% (λ = 254 nm).

***N1*-(2-(2-(2-(dimethylamino)ethyl)-2*H*-tetrazol-5-yl)quinolin-4-yl)-*N*4,*N*4-diethylbenzene-1,4-diamine (24)**. white solid, melting point: 244.3-245.8 ℃, yield: 38.6%. 1H NMR (400 MHz, CDCl3) δ 7.91 (d, *J* = 9.8 Hz, 1H), 7.70 (d, *J* = 7.3 Hz, 1H), 7.57 (t, *J* = 7.7 Hz, 1H), 7.27 (t, *J* = 8.2 Hz, 1H), 7.20 (d, *J* = 8.9 Hz, 2H), 6.84 (s, 1H), 6.72 (s, 1H), 6.65 (d, *J* = 9.2 Hz, 2H), 4.41 (t, *J* = 6.1 Hz, 2H), 3.34 (q, *J* = 7.1 Hz, 4H), 2.70 (t, *J* = 6.1 Hz, 2H), 2.14 (s, 6H), 1.17 (t, *J* = 7.0 Hz, 6H). 13C NMR (100 MHz, CDCl3) δ 155.33, 150.02, 148.41, 145.49, 139.77, 130.62, 127.42, 125.01, 123.94, 123.31, 122.14, 113.45, 112.88, 112.17, 111.50, 58.06, 46.40, 45.42, 44.73, 12.63. HRMS (ESI) calcd for C24H30N8S [M+H]+, 463.2387; found: 463.2386. HPLC retention time = 5.933 min, purity = 95.20% (λ = 254 nm).

**2,4-dichloro-6-methylquinoline (B-2)**. white solid, yield: 80.1%. 1H NMR (400 MHz, CDCl3) δ 7.91–7.90 (m, 1H), 7.89 (d, J = 8.7 Hz, 1H), 7.60–7.55 (m, 1H), 7.43 (s, 1H), 2.55 (s, 3H). 13C NMR (100 MHz, CDCl3) δ 148.91, 146.78, 143.68, 138.32, 133.80, 128.75, 125.16, 123.13, 121.93, 21.90.

**2,4-dichloro-7-methylquinoline (B-3).** white solid, yield: 82.6%. 1H NMR (400 MHz, CDCl3) δ 8.04 (d, *J* = 8.6 Hz, 1H), 7.78 (s, 1H), 7.47–7.43 (m, 1H), 7.41 (s, 1H), 2.56 (s, 3H). 13C NMR (100 MHz, CDCl3) δ 149.88, 148.48, 144.23, 142.44, 130.16, 128.11, 123.93, 123.33, 121.17, 21.90.

**2,4-dichloro-7-methoxyquinoline (B-4).** white solid, yield: 82.3%. 1H NMR (400 MHz, CDCl3) δ 7.89 (d, *J* = 9.2 Hz, 1H), 7.44 (s, 1H), 7.42–7.36 (m, 1H), 7.35 (d, *J* = 2.8 Hz, 1H), 3.95 (s, 3H). 13C NMR (100 MHz, CDCl3) δ 159.00, 147.09, 144.11, 142.71, 130.58, 126.37, 122.56, 121.63, 102.59, 55.10.

**2,4,7-trichloroquinoline (B-5).** white solid, yield: 82.3%. 1H NMR (400 MHz, CDCl3) δ 8.05 (d, *J* = 8.9 Hz, 1H), 7.96 (d, *J* = 2.1 Hz, 1H), 7.56–7.51 (m, 1H), 7.44 (s, 1H). 13C NMR (100 MHz, CDCl3) δ 151.21, 148.41, 144.41, 137.91, 128.98, 127.99, 125.59, 123.71, 122.23.

**2,4-dichloro-6-fluoroquinoline (B-6).** white solid, yield: 88.3%. 1H NMR (400 MHz, CDCl3) δ 8.02–7.97 (m, 1H), 7.78–7.73 (m, 1H), 7.56–7.52 (m, 1H), 7.49 (s, 1H). 13C NMR (100 MHz, CDCl3) δ 162.59, 160.09, 149.29, 145.14, 143.57, 126.36, 122.76, 108.18.

**2,4-dichloro-6-(trifluoromethyl)quinoline (B-7).** yellow solid, yield: 79.2%. 1H NMR (400 MHz, CDCl3) δ 8.50 (s, 1H), 8.15 (d, *J* = 8.9 Hz, 1H), 7.99–7.94 (m, 1H), 7.61 (s, 1H). 13C NMR (100 MHz, CDCl3) δ 152.44, 149.24, 145.27, 130.41, 130.09, 127.49, 125.01, 123.43, 122.30.

**2,4-dichloro-6-nitroquinoline (B-8).** red solid, yield: 62.9%. 1H NMR (400 MHz, CDCl3) δ 9.12 (s, 1H), 8.54 (d, *J* = 9.2 Hz, 1H), 8.16 (d, *J* = 8.6 Hz, 1H), 7.66 (s, 1H). 13C NMR (100 MHz, CDCl3) δ 153.93, 150.25, 146.13, 131.76, 130.44, 125.78, 124.82, 121.40.

***N1*-(2-chloro-6-methylquinolin-4-yl)-*N4,N4*-diethylbenzene-1,4-diamine (C-2).** yellow solid, yield: 9.6%. 1H NMR (400 MHz, CDCl3) δ 7.76 (s, 1H), 7.58 (d, *J* = 8.5 Hz, 1H), 7.43–7.39 (m, 1H), 7.20 (d, *J* = 9.0 Hz, 2H), 6.93 (s, 1H), 6.73 (s, 1H), 6.71 (d, *J* = 9.2 Hz, 2H), 3.36 (q, *J* = 7.0 Hz, 4H), 2.48 (s, 3H), 1.18 (t, *J* = 7.0 Hz, 6H). 13C NMR (100 MHz, CDCl3) δ 162.71, 156.44, 152.13, 147.32, 133.57, 117.84, 111.52, 32.61, 28.46.

***N1*-(2-chloro-7-methylquinolin-4-yl)-*N4,N4*-diethylbenzene-1,4-diamine (C-3)**. yellow solid, yield: 41.3%. 1H NMR (400 MHz, CDCl3) δ 7.89–7.51 (m, 1H), 7.40 (d, *J* = 15.6 Hz, 1H), 7.21 (d, *J* = 9.0 Hz, 2H), 7.12 (d, *J* = 8.2 Hz, 1H), 7.05–6.95 (d, *J* = 6.9 Hz, 1H), 6.90 (d, *J* = 12.9 Hz, 1H), 6.70 (d, *J* = 9.0 Hz, 2H), 3.37 (q, *J* = 7.1 Hz, 4H), 2.92 (s, 1H), 2.45 (s, 2H), 1.18 (t, *J* = 7.1 Hz, 6H). 13C NMR (100 MHz, CDCl3) δ 156.71, 155.68, 150.67, 148.87, 146.04, 143.35, 141.16, 135.44, 127.09, 125.80, 123.91, 120.08, 113.39, 111.99, 109.79, 108.38, 44.68, 12.65.

***N1*-(2-chloro-7-methoxyquinolin-4-yl)-*N4,N4*-diethylbenzene-1,4-diamine (C-4)**. yellow solid, yield: 27.5%. 1H NMR (400 MHz, CDCl3) δ 9.00 (s, 1H), 7.48 (d, *J* = 1.9 Hz, 1H), 7.47 (s, 1H), 7.12 (d, *J* = 8.9 Hz, 2H), 6.76 (m, 1H), 6.74–6.68 (d, *J* = 9.0 Hz, 2H), 6.44 (s, 1H), 4.00 (s, 4H), 3.39 (q, *J* = 7.1 Hz, 3H), 1.20 (d, *J* = 14.1 Hz, 6H). 13C NMR (100MHz, CDCl3) δ 157.56, 154.66, 152.34, 150.92, 146.63, 128.34, 126.91, 126.26, 113.32, 111.87, 109.82, 105.10, 103.66, 100.37, 98.82, 44.63, 12.64.

***N1*-(2,7-dichloroquinolin-4-yl)-*N4,N4*-diethylbenzene-1,4-diamine (C-5).** yellow solid, yield: 14.5%. 1H NMR (400 MHz, DMSO-*d*6) δ 10.45 (s, 1H), 8.21 (d, *J* = 9.0 Hz, 2H), 7.98 (d, *J* = 8.8 Hz, 1H), 7.87 (d, *J* = 2.1 Hz, 1H), 7.79 (d, *J* = 9.0 Hz, 2H), 7.50–7.43 (m, 2H), 3.64–3.49 (m, 4H), 1.08 (t, *J* = 7.2 Hz, 6H). 13C NMR (100 MHz, DMSO-*d*6) δ 158.69, 144.21, 142.60, 129.45, 127.02, 122.32, 117.45, 111.80, 43.71, 43.23, 12.52.

***N1*-(2-chloro-6-fluoroquinolin-4-yl)-*N4,N4*-diethylbenzene-1,4-diamine (C-6).** yellow solid, yield: 20.7%. 1H NMR (400 MHz, CDCl3) δ 7.63 (d, *J* = 9.4 Hz, 2H), 7.37–7.27 (m, 1H), 7.19 (d, *J* = 8.9 Hz, 2H), 6.97 (s, 2H), 6.70 (d, *J* = 9.0 Hz, 2H), 3.36 (q, *J* = 7.1 Hz, 4H), 1.18 (t, *J* = 7.0 Hz, 6H). 13C NMR (100 MHz, CDCl3) δ 144.12, 142.45, 140.45, 124.60, 112.82, 29.75, 23.02, 13.25.

***N1*-(2-chloro-6-(trifluoromethyl)quinolin-4-yl)-*N4,N4*-diethylbenzene-1,4-diamine (C-7).** yellow solid, yield: 23.1%. 1H NMR (400 MHz, CDCl3) δ 8.27 (s, 1H), 7.73 (d, *J* = 2.4 Hz, 2H), 7.21 (d, *J* = 9.0 Hz, 2H), 7.00 (s, 1H), 6.90 (s, 1H), 6.71 (d, *J* = 8.9 Hz, 2H), 3.38 (q, *J* = 7.0 Hz, 4H), 1.20 (t, *J* = 7.1 Hz, 6H). 13C NMR (100 MHz, CDCl3) δ 157.81, 150.45, 146.42, 143.92, 125.99, 125.80, 124.88, 124.56, 123.10, 121.24, 113.19, 111.87, 44.64, 12.64.

***N1*-(2-chloro-6-nitroquinolin-4-yl)-*N4,N4*-diethylbenzene-1,4-diamine (C-8)**. red solid, yield: 34.8%. 1H NMR (400 MHz, DMSO-*d*6) δ 10.58 (s, 1H), 8.78 (s, 1H), 8.43 (d, *J* = 7.9 Hz, 1H), 8.16 (s, 2H), 7.92 (s, 1H), 7.70 (s, 1H), 7.48 (s, 1H), 3.54 (s, 4H), 1.06 (t, *J* = 7.3 Hz, 6H).

***N1,N1*-diethyl-*N4*-(2-(furan-2-yl)-6-methoxyquinolin-4-yl)benzene-1,4-diamine (25)**. yellow solid, melting point: 232.6-233.7 ℃, yield: 50.3%. 1H NMR (400 MHz, CDCl3) δ 7.97 (s, 1H), 7.65 (d, *J* = 8.4 Hz, 1H), 7.59 (d, *J* = 2.4 Hz, 1H), 7.43–7.38 (m, 1H), 7.27 (d, *J* = 11.5 Hz, 1H), 7.09 (s, 1H), 6.83 (d, *J* = 3.4 Hz, 1H), 6.71 (d, *J* = 9.0 Hz, 2H), 6.62 (s, 1H), 6.58–6.53 (m, 1H), 3.36 (q, *J* = 7.1 Hz, 4H), 2.47 (s, 3H), 1.18 (t, *J* = 7.0 Hz, 6H). 13C NMR (100 MHz, CDCl3) δ 155.14, 148.71, 147.53, 138.17, 134.39, 129.04, 128.92, 128.33, 125.83, 125.44, 124.93, 124.27, 122.02, 121.71, 112.77, 109.50, 40.22, 28.97, 14.91. HRMS (ESI) calcd for C24H25N3O [M+H]+, 372.2070; found: 372.2075. HPLC retention time = 6.799 min, purity = 95.50% (λ = 254 nm).

***N1,N1*-diethyl-*N4*-(2-(furan-2-yl)-7-methylquinolin-4-yl)benzene-1,4-diamine (26)**. yellow solid, melting point: 233.9-235.2 ℃, yield: 44.9%. 1H NMR (400 MHz, CDCl3) δ 7.61 (d, *J* = 7.3 Hz, 1H), 7.52 (s, 1H), 7.48–7.39 (m, 1H), 7.24 (d, *J* = 8.9 Hz, 2H), 7.04 (d, *J* = 6.9 Hz, 1H), 6.85 (s, 1H), 6.69 (d, *J* = 8.9 Hz, 2H), 6.61 (s, 1H), 6.52–6.46 (m, 1H), 6.39 (d, *J* = 3.3 Hz, 1H), 3.35 (q, *J* = 7.1 Hz, 4H), 2.07 (s, 3H), 1.17 (t, *J* = 7.1 Hz, 6H). 13C NMR (100 MHz, CDCl3) δ 155.02, 149.72, 138.74, 135.47, 125.60, 113.47, 112.08, 110.77, 44.67, 12.63. HRMS (ESI) calcd for C24H25N3O [M+H]+, 372.2070; found: 372.2076. HPLC retention time = 6.764 min, purity = 98.02% (λ = 254 nm).

***N1,N1*-diethyl-*N4*-(2-(furan-2-yl)-7-methoxyquinolin-4-yl)benzene-1,4-diamine (27)**. yellow solid, melting point: 244.9-246.8 ℃, yield: 38.2%. 1H NMR (400 MHz, CDCl3) δ 8.97 (s, 1H), 7.61 (d, *J* = 8.4 Hz, 1H), 7.51–7.40 (m, 2H), 7.20 (d, *J* = 8.9 Hz, 2H), 7.00 (d, *J* = 6.3 Hz, 2H), 6.75 (d, *J* = 9.0 Hz, 2H), 6.72 (d, *J* = 7.8 Hz, 1H), 6.48–6.44 (m, 1H), 3.99 (s, 3H), 3.40 (q, *J* = 7.0 Hz, 4H), 1.21 (t, *J* = 7.1 Hz, 6H). 13C NMR (100 MHz, CDCl3) δ 157.51, 152.87, 149.65, 146.23, 127.91, 126.63, 113.46, 112.04, 110.12, 104.38, 102.91, 96.87, 95.47, 44.64, 12.69. HRMS (ESI) calcd for C24H25N3O2 [M+H]+, 388.2020; found: 388.2024. HPLC retention time = 7.169 min, purity = 96.83% (λ = 254 nm).

***N1*-(7-chloro-2-(furan-2-yl)quinolin-4-yl)-*N4,N4*-diethylbenzene-1,4-diamine (28).** yellow solid, melting point: 234.8-235.7 ℃, yield: 4.8%. 1H NMR (400 MHz, CDCl3) δ 8.14 (d, *J* = 8.9 Hz, 1H), 7.72 (d, *J* = 2.0 Hz, 1H), 7.60 (s, 1H), 7.28 (d, *J* = 8.8 Hz, 2H), 7.21 (d, *J* = 8.9 Hz, 1H), 7.06 (s, 1H), 6.82 (d, *J* = 3.3 Hz, 1H), 6.72 (d, *J* = 9.0 Hz, 3H), 6.57 (s, 1H), 3.37 (q, *J* = 7.2 Hz, 4H). 1.19 (t, *J* = 7.0 Hz, 6H). 13C NMR (100 MHz, CDCl3) δ 206.38, 156.71, 137.36, 135.57, 119.10, 44.68, 12.67. HRMS (ESI) calcd for C23H22ClN3O [M+H]+, 392.1524; found: 392.1525. HPLC retention time = 7.281 min, purity = 97.90% (λ = 254 nm).

***N1,N1*-diethyl-*N4-(*6-fluoro-2-(furan-2-yl)quinolin-4-yl)benzene-1,4-diamine (29)**. yellow solid, melting point: 232.9-233.7 ℃, yield: 40.99%. 1H NMR (400 MHz, CDCl3) δ 7.76 (d, *J* = 9.0 Hz, 1H, -C9H4FN-), 7.68–7.62 (m, 1H, -C9H4FN-), 7.34–7.27 (m, 1H, -C9H4FN-), 7.25–7.20 (d, *J* = 3.6 Hz, 2H, Ar-H), 6.88 (d, *J* = 8.9 Hz, 1H, -C4H3O), 6.70 (d, *J* = 8.9 Hz, 2H, Ar-H), 6.64 (s, 1H, -C4H3O), 3.36 (q, *J* = 7.2 Hz, 4H, -CH2-), 1.18 (t, *J* = 7.1 Hz, 6H, -CH3). 13C NMR (100MHz, CDCl3 ) δ 159.85, 157.46, 155.77, 151.09, 146.00, 145.65, 143.65, 136.92, 128.75, 127.93, 125.39, 120.77, 119.02, 112.87, 111.84, 111.38, 109.37, 44.69, 12.68. 19F NMR (376 MHz, CDCl3) δ -118.89. HRMS (ESI) calcd for C23H22FN3O [M+H]+, 376.1820; found: 376.1821. HPLC retention time = 7.222 min, purity = 98.53% (λ = 254 nm).

***N1,N1*-diethyl-*N4*-(2-(furan-2-yl)-6-(trifluoromethyl)quinolin-4-yl)benzene-1,4-diamine (30).** yellow solid, melting point: 235.8-236.9 ℃, yield: 67.2%. 1H NMR (400 MHz, CDCl3) δ 8.52 (s, 1H), 7.81–7.69 (m, 2H), 7.63 (s, 1H), 7.28 (d, *J* = 8.9 Hz, 2H), 7.13 (s, 1H), 6.85 (d, *J* = 3.4 Hz, 2H), 6.72 (d, *J* = 8.7 Hz, 2H), 6.59 (s, 1H), 3.38 (q, *J* = 7.0 Hz, 4H), 1.19 (t, *J* = 7.0 Hz, 6H). 13C NMR (100 MHz, CDCl3) δ 157.45, 150.72, 145.97, 144.07, 137.97, 127.54, 127.03, 125.61, 119.63, 112.13, 111.38, 44.67, 12.67. 19F NMR (376 MHz, CDCl3) δ -61.47. HRMS (ESI) calcd for C24H22F3N3O [M+H]+, 426.1788; found: 426.1791. HPLC retention time = 7.647 min, purity = 95.64% (λ = 254 nm).

***N*1,*N*1-diethyl-*N*4-(2-(furan-2-yl)-6-nitroquinolin-4-yl)benzene-1,4-diamine (31)**. red solid, melting point: 254.6-256.1 ℃, yield: 73.8%. 1H NMR (400 MHz, CDCl3) δ 9.21 (d, *J* = 2.6 Hz, 1H), 8.36–8.26 (m 1H), 7.69 (d, *J* = 9.3 Hz, 1H), 7.67–7.63 (m, 2H), 7.29 (d, *J* = 8.9 Hz, 2H), 7.16 (s, 1H), 6.97–6.91 (m, 2H), 6.76–6.68 (m, 1H), 6.62–6.60 (m, 1H), 3.39 (q, *J* = 7.2 Hz, 4H), 1.20 (t, *J* = 7.1 Hz, 6H). 13C NMR (100 MHz, CDCl3) δ 152.79, 142.45, 138.85, 111.84, 44.65, 12.66. HRMS (ESI) calcd for C23H22N4O3 [M+H]+, 403.1765; found: 403.1769. HPLC retention time = 7.596 min, purity = 95.54% (λ = 254 nm).

**2-chloro-6-fluoro-*N*-phenylquinolin-4-amine (B-25)**. brown solid, yield: 41.5% 1H NMR (400 MHz, CDCl3) δ 7.98–7.91 (m, 1H), 7.54–7.48 (m, 2H), 7.46 (d, *J* = 8.2 Hz, 2H), 7.30 (d, *J* = 7.7 Hz, 2H), 7.27 (s, 1H), 6.90 (s, 1H), 6.55 (s, 1H). 13C NMR (100 MHz, CDCl3) δ 151.40, 149.39, 145.45, 138.68, 136.26, 131.95, 123.97, 119.22, 103.00, 84.89.

**2-chloro-6-fluoro-*N*-(p-tolyl)quinolin-4-amine (B-26)**. white solid, yield: 37.5%. 1H NMR (400 MHz, CDCl3) δ 7.97–7.91 (m, 1H), 7.53–7.41 (m, 2H), 7.28 (s, 1H), 7.26 (s, 1H), 7.19 (d, *J* = 8.3 Hz, 2H), 6.79 (s, 1H), 6.49 (s, 1H), 2.40 (s, 3H). 13C NMR (100 MHz, CDCL3) δ 151.42, 149.89, 145.40, 135.84, 132.73, 130.96, 129.94, 124.84, 119.43, 101.01, 21.74.

**2-chloro-6-fluoro-*N*-(4-methoxyphenyl)quinolin-4-amine (B-27)**. white solid, yield: 51.3%. 1H NMR (400 MHz, CDCl3) δ 7.96–7.88 (m, 1H), 7.46 (t, *J* = 7.4 Hz, 2H), 7.21 (d, *J* = 8.6 Hz, 2H), 6.98 (d, *J* = 8.8 Hz, 2H), 6.73 (d, *J* = 8.9 Hz, 1H), 6.64 (d, *J* = 8.7 Hz, 1H), 6.59 (s, 1H), 6.45 (s, 1H), 3.85 (s, 3H). 13C NMR (100 MHz, CDCl3) δ 158.21, 151.46, 150.69, 149.09, 132.71, 127.37, 125.99, 116.06, 114.56, 102.16, 54.86.

**2-chloro-6-fluoro-*N*-(4-morpholinophenyl)quinolin-4-amine (B-28).** brown solid, yield: 29.8%. 1H NMR (400 MHz, CDCl3) δ 7.72–7.67 (m, 1H), 7.67–7.61 (m, 1H), 7.41–7.31 (t, *J* = 8.2 Hz, 3H), 7.00 (s, 1H), 6.95 (d, *J* = 8.9 Hz, 2H), 6.74 (s, 3H), 3.92–3.85 (m, 4H), 3.20–3.13 (m, 4H). 13C NMR (100 MHz, CDCl3) δ 163.27, 155.11, 147.58, 146.03, 145.59, 138.82, 129.04, 127.98, 126.55, 125.81, 124.39, 121.84, 112.66, 109.71, 40.09.

**6-fluoro-2-(furan-2-yl)-*N*-phenylquinolin-4-amine (32)**. white solid, melting point: 244.1-245.1 ℃, yield: 40.2%. 1H NMR (400 MHz, CDCl3) δ 8.10–8.02 (m, 1H), 7.54–7.48 (m, 2H), 7.48–7.40 (m, 4H), 7.32 (d, *J* = 7.4 Hz, 2H), 7.21 (t, *J* = 7.4 Hz, 1H), 6.53–6.49 (m, 1H). 13C NMR (100 MHz, CDCl3) δ 161.27, 158.81, 153.86, 149.27, 149.25, 147.53, 147.48, 146.30, 143.78, 139.87, 132.60, 132.51, 129.93, 124.74, 122.47, 119.80, 119.67, 119.58, 119.56, 112.11, 109.62, 104.15, 103.92, 99.03. 19F NMR (376 MHz, CDCl3) δ -108.49. HRMS (ESI) calcd for C19H13FN2O [M+H]+, 305.1085; found: 305.1088. HPLC retention time = 7.394 min, purity = 95.31% (λ = 254 nm).

**6-fluoro-2-(furan-2-yl)-*N*-(p-tolyl)quinolin-4-amine (33).** white solid, melting point: 243.6-245.3 ℃, yield: 47.4%. 1H NMR (400 MHz, CDCl3) δ 8.11–8.03 (m, 1H), 7.51 (d, *J* = 12.3 Hz, 2H), 7.44 (t, *J* = 8.5 Hz, 1H), 7.37 (s, 1H), 7.27 (s, 1H), 7.26–7.21 (m, 3H), 7.07 (d, *J* = 3.0 Hz, 1H), 6.51 (s, 1H), 6.44 (s, 1H), 2.41 (s, 3H). 13C NMR (100 MHz, CDCl3) δ 154.65, 149.91, 147.65, 146.88, 142.07, 136.05, 128.34, 127.96, 125.60, 123.91, 123.47, 121.46, 119.34, 112.25, 110.37, 110.16, 106.92, 39.68. 19F NMR (376 MHz, CDCl3) δ -102.84. HRMS (ESI) calcd for C20H15FN2O [M+H]+, 319.1241; found: 319.1246. HPLC retention time = 6.933 min, purity = 95.67% (λ = 254 nm).

**6-fluoro-2-(furan-2-yl)-*N*-(4-methoxyphenyl)quinolin-4-amine (34)**. white solid, melting point: 271.3-272.6 ℃, yield: 11.3%. 1H NMR (400 MHz, CDCl3) δ 8.11–8.03 (m, 1H), 7.52 (s, 1H), 7.50–7.40 (m, 2H), 7.28 (s, 1H), 7.17 (s, 1H), 7.05 (s, 1H), 7.01 (d, *J* = 8.9 Hz, 2H), 6.52–6.50 (m, 1H), 6.34 (s, 1H), 3.88 (s, 3H). 13C NMR (100 MHz, CDCl3) δ 155.83, 149.83, 149.50, 148.44, 146.28, 136.76, 134.29, 130.01, 128.77, 126.65, 125.15, 125.08, 123.19, 122.83, 122.41, 113.49, 110.90, 40.90. 19F NMR (376 MHz, CDCl3) δ -110.64. HRMS (ESI) calcd for C20H15FN2O2 [M+H]+, 335.1190; found: 335.1180. HPLC retention time = 6.933 min, purity = 95.67% (λ = 254 nm).

**6-fluoro-2-(furan-2-yl)-*N*-(4-morpholinophenyl)quinolin-4-amine (35)**. gray solid, melting point: 263.4-265.1 ℃, yield: 27.9%. 1H NMR (400 MHz, CDCl3) δ 7.96–7.87 (m, 1H), 7.78–7.71 (m, 1H), 7.63 (s, 1H), 7.43 (d, *J* = 9.0 Hz, 2H), 7.41–7.33 (m, 1H), 7.15 (s, 1H), 6.96 (d, *J* = 8.8 Hz, 2H), 6.86 (d, *J* = 3.5 Hz, 1H), 6.67–6.56 (m, 2H), 3.89 (t, *J* = 4.8 Hz, 4H), 3.16 (t, *J* = 4.8 Hz, 4H). 13C NMR (100 MHz, CDCl3) δ 160.10, 157.70, 154.66, 150.88, 148.18, 137.03 (d, *J* = 4.8 Hz), 132.60, 129.53, 123.40, 120.92, 67.05, 49.96. 19F NMR (376 MHz, CDCl3) δ -116.44. HRMS (ESI) calcd for C23H22FN3O2 [M+H]+, 390.1612; found: 390.1617. HPLC retention time = 6.760 min, purity = 98.54% (λ = 254 nm).

***N*1,*N*1-diethyl-*N*4-(6-fluoro-2-(furan-2-yl)quinolin-4-yl)-*N*4-methylbenzene-1,4-diamine (36)**. orange solid, melting point: 238.1-239.7 ℃, yield: 12.9%. 1H NMR (400 MHz, CDCl3) δ 7.88–7.83 (m, 1H), 7.82–7.77 (m, 1H), 7.55 (d, *J* = 2.0 Hz, 1H), 7.36–7.30 (m, 1H), 7.13 (d, *J* = 9.0 Hz, 2H), 6.96 (s, 1H), 6.73 (d, *J* = 9.0 Hz, 2H), 6.70 (d, *J* = 3.4 Hz, 1H), 6.53–6.93 (m, 1H), 3.57 (s, 3H), 3.40 (q, *J* = 7.0 Hz, 4H), 1.21 (t, *J* = 7.0 Hz, 6H). 13C NMR (100 MHz, CDCl3) δ 156.59, 148.84, 148.01, 146.06, 145.70, 143.45, 137.74, 130.75, 129.79, 127.97, 127.57, 127.11, 126.12, 125.80, 124.20, 123.92, 122.44, 53.54, 44.72, 12.67. HRMS (ESI) calcd for C24H24FN3O [M+H]+, 390.1976;

### 1H NMR, 13C NMR, and 19F NMR spectra of compounds

13C NMR spectrum of compound 24

### HRMS spectra of target compounds


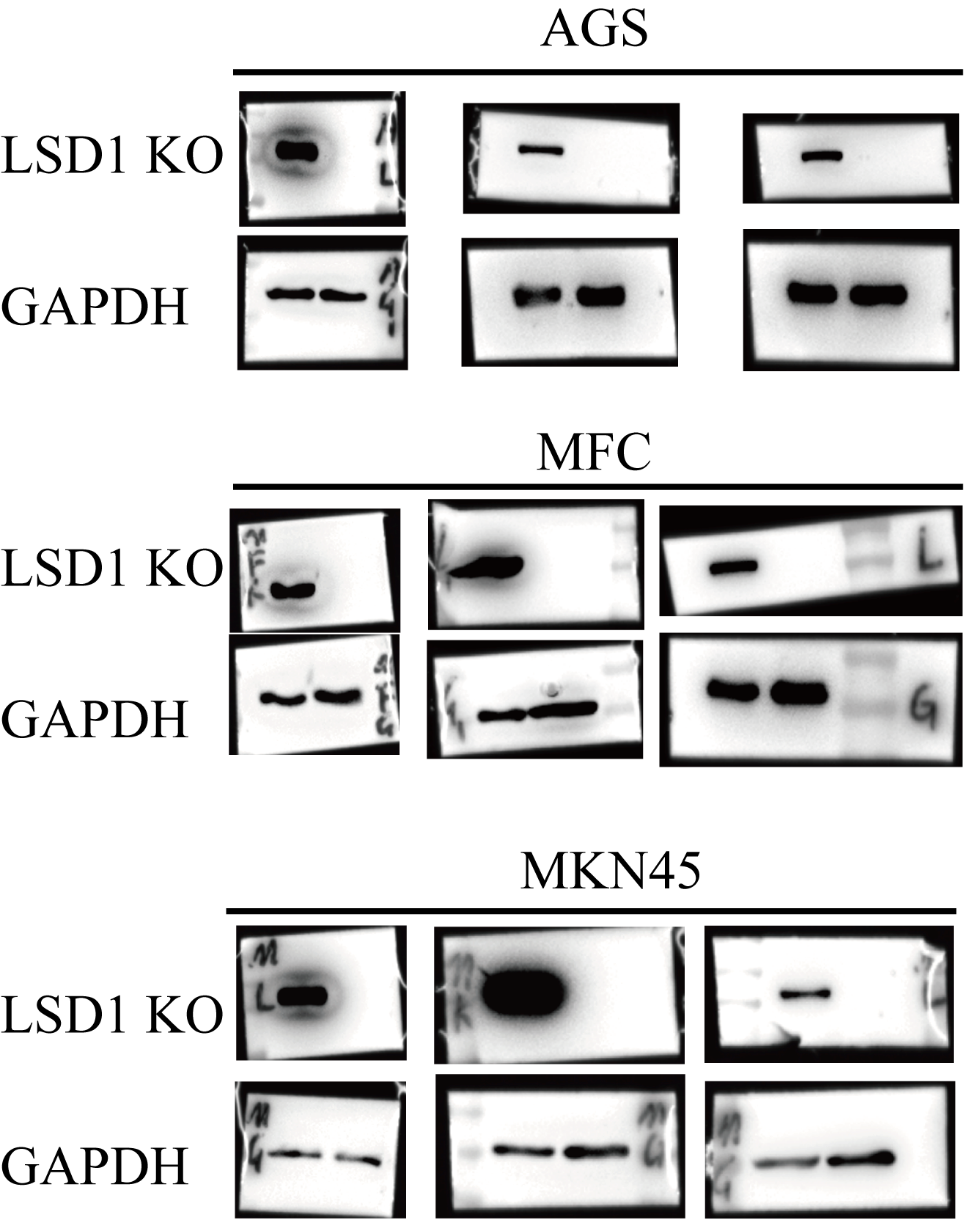
Original Western Blots
